# Supplementary material
Source: publisher figshare collection journal article supplement (https://acs.figshare.com/ndownloader/files/23613866)
Supplement: Supplementary file 1 [file 23613866]

## *Supporting Information*

# Substitutional Fluorine Doping of Large-Area Molybdenum Disulfide Monolayer Films for Flexible Inverter Device Arrays

*Sang-Soo Chee\*, Hanbyeol Jang, Kayoung Lee, and Moon-Ho Ham\**

School of Materials Science and Engineering, Gwangju Institute of Science & Technology (GIST),  
123 Cheomdangwagi-ro, Buk-gu, Gwangju 61005, Republic of Korea

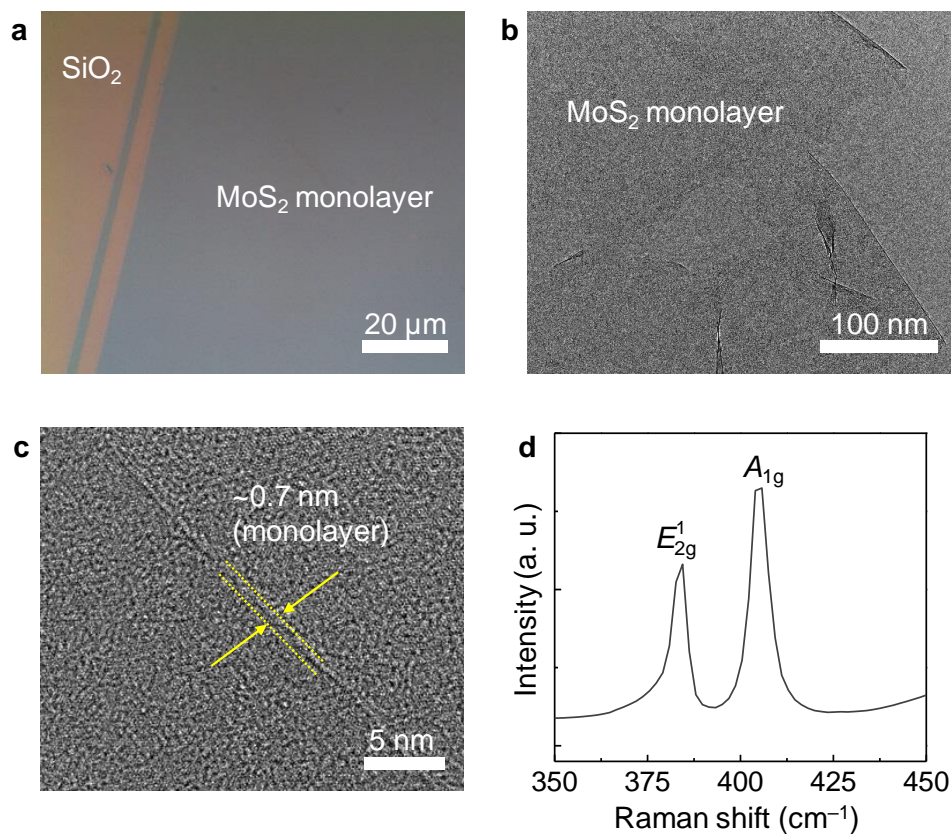

**Figure S1.** (a) Optical microscopy and (b,c) transmission electron microscopy (TEM) images of CVD-grown MoS<sub>2</sub> monolayer. TEM images indicate that our synthesized large-area MoS<sub>2</sub> film is monolayer. (d) Raman spectrum of a MoS<sub>2</sub> film grown by a CVD.

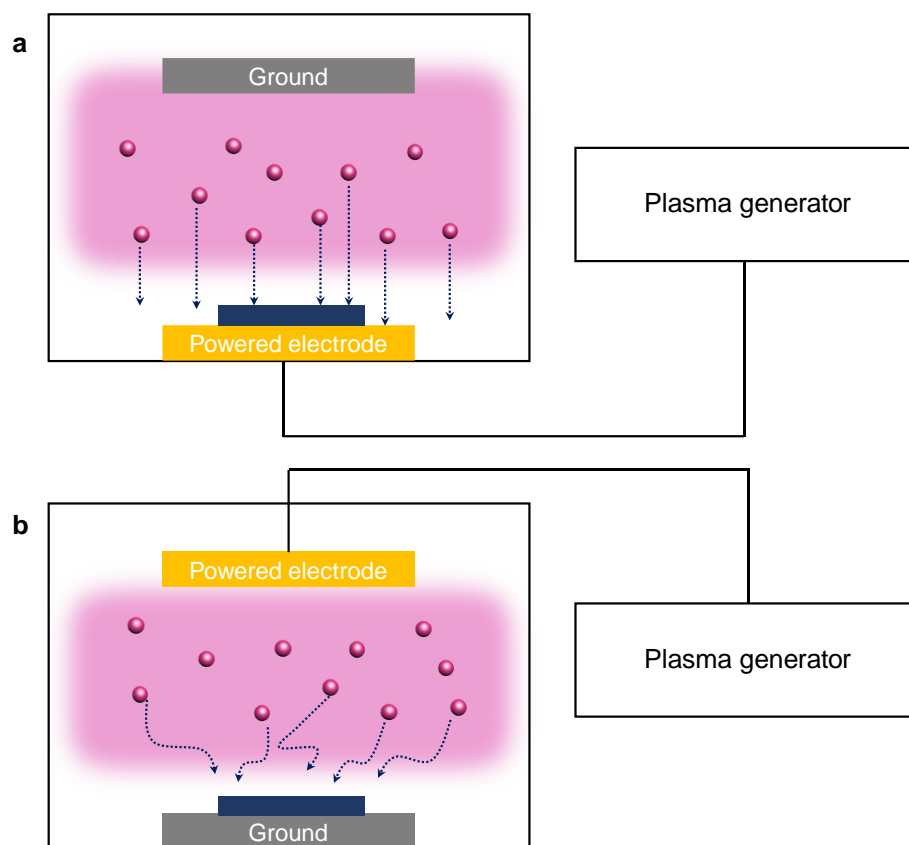

**Figure S2.** Schematic illustrations of (a) conventional and (b) our plasma treatment systems.

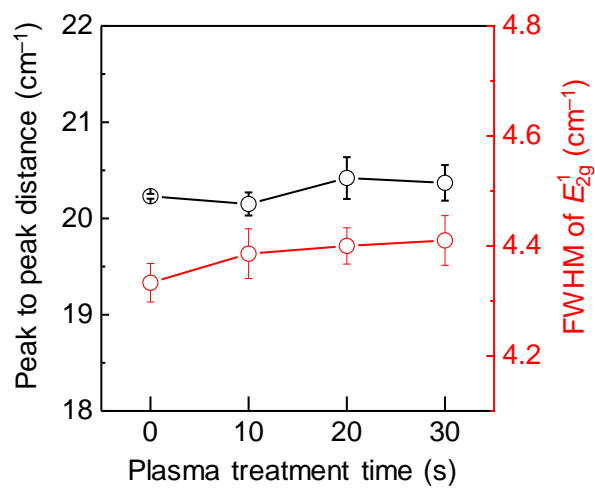

**Figure S3.** Variations of peak to peak distance ( $A_{1g} - E_{2g}^I$ ) and fwhm of  $E_{2g}^I$  peak of the SF<sub>6</sub>-treated MoS<sub>2</sub> monolayer with varying plasma treatment time.

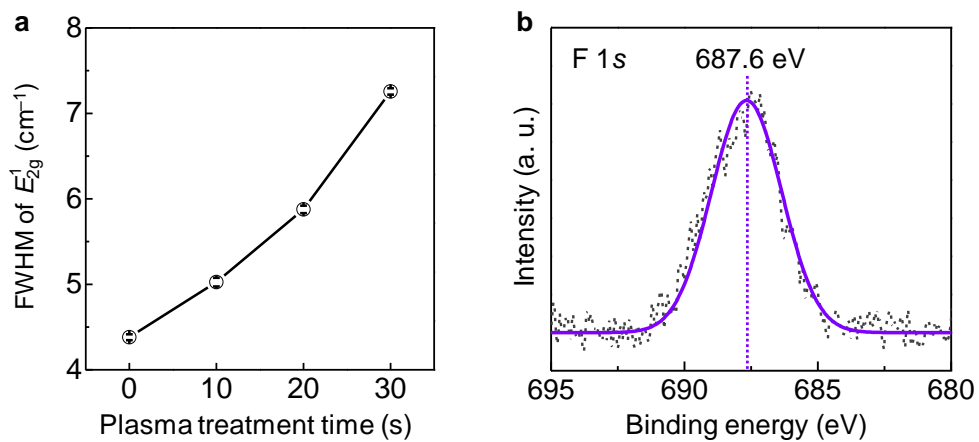

**Figure S4.** (a) Variations of fwhm of  $E_{2g}^l$  peak of  $\text{MoS}_2$  monolayer films treated by conventional plasma treatment system with varying plasma treatment time. (b) F 1s XPS spectrum of a  $\text{MoS}_2$  monolayer film treated by conventional plasma at an applied power of 10 W for 10 sec.

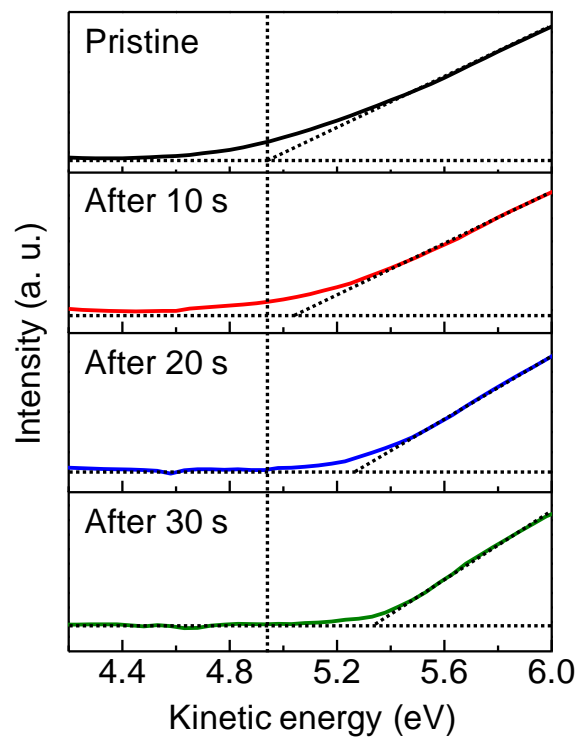

**Figure S5.** UPS spectra of the pristine and the SF<sub>6</sub>-treated MoS<sub>2</sub> monolayer with varying plasma treatment time.

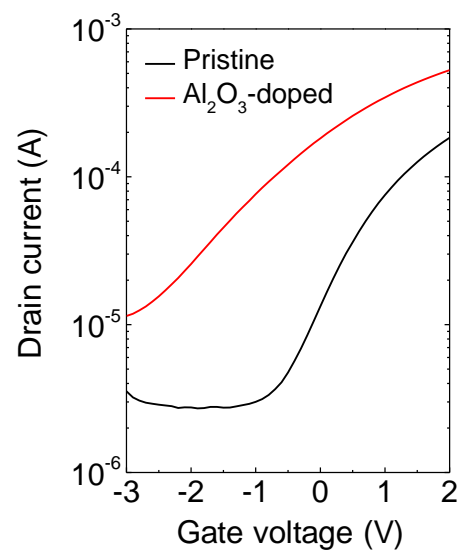

**Figure S6.** Transfer characteristics of MoS<sub>2</sub> monolayer device before (pristine) and after 20 nm thick Al<sub>2</sub>O<sub>3</sub> film deposition.  $V_{th}$  shifts toward negative gate voltage side, and on current level increases, which indicates the *n*-type doping effect.

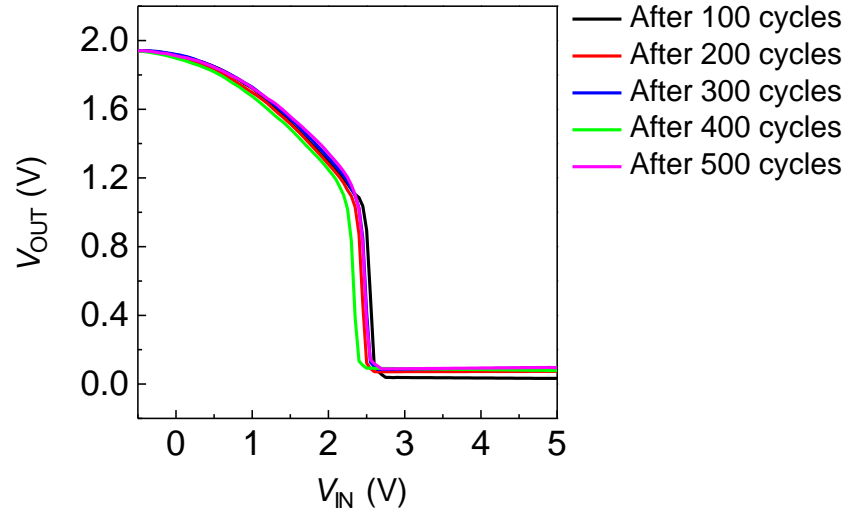

**Figure S7.**  $V_{OUT}$ - $V_{IN}$  curves of the MoS<sub>2</sub> homojunction flexible inverter device applied at  $V_{DD} = 2$  V under repetitive bending cycles with strain of 0.5%. There is almost no change of curves after each cycle.
